# Supplementary material for: Is age kinder to the initially more able?: Yes, and no
Source: PubMed Central journal article supplement (PMC3657153; doi:10.1016/j.intell.2011.10.007), 2012-01
Supplement: mmc1.pdf [file mmc1.pdf]

Supplementary Table 1

*Summary of recruitment, testing and attrition in the Lothian Birth Cohort 1921 and the MRC National Survey of Health and Development*

|         | Year      | Age in<br>years | Withdrawals<br>before next<br>invitation | Deaths<br>before next<br>invitation | Invited <sup>a</sup> | Successfully<br>tested | Died | Lost<br>contact | Temporary<br>refusal | Withdrawal |
|---------|-----------|-----------------|------------------------------------------|-------------------------------------|----------------------|------------------------|------|-----------------|----------------------|------------|
| LBC1921 | 1999-2001 | 79.1 (0.6)      | -                                        | -                                   | 550                  | -                      | -    | -               | -                    | -          |
|         | 2003-05   | 83.4 (0.5)      | 40                                       | 69                                  | 454                  | 321                    | 10   | 13              | 94                   | 16         |
|         | 2007-08   | 86.6 (0.4)      | 3                                        | 51                                  | 268                  | 207 <sup>b</sup>       | 8    | 4               | 42                   | 7          |
| NSHD    | 1989      | 43              | -                                        | -                                   | 3262                 |                        |      |                 |                      |            |
|         | 1999      | 53              | 100                                      | 104                                 | 3673                 | 3035                   | 28   | 330             | 280                  |            |

*Note.* <sup>a</sup>For both cohorts, the number of participants invited to a given wave exceeds the number tested at the previous wave minus those dead or withdrawn between waves, as some participants were invited that had not completed the previous wave. <sup>b</sup>Thirty LBC1921 participants completed questionnaires but were unable to attend the clinic or receive a home visit, giving total N = 237; these participants are recorded in the table as temporary refusal as they are not included in the current analyses.

Supplementary Table 2

*Mean (sd) cognitive ability test scores for the MRC National Survey of Health and Development*

|        | Full sample  |              | Returning sample (attended both waves) |              |                              |
|--------|--------------|--------------|----------------------------------------|--------------|------------------------------|
|        | 43           | 53           | 43                                     | 53           |                              |
| Verbal | 24.7 (6.4)   | 23.9 (6.3)   | 25.0 (6.3)                             | 24.1 (6.2)   | $t(2597) = 8.539, p < .001$  |
| Memory |              |              |                                        |              |                              |
| Search | 341.9 (76.2) | 281.2 (76.2) | 342.0 (76.2)                           | 281.4 (75.7) | $t(2672) = 42.693, p < .001$ |
| Speed  |              |              |                                        |              |                              |

*Note.* For the full sample, N = 3059 for Verbal Memory and 3131 for Search Speed at age 43, and N = 2887 for Verbal Memory and 2933 for Search Speed at age 53. For the returning sample, N = 2598 for Verbal Memory and 2673 for Search Speed. The t-tests report significant decline across waves for both Verbal Memory and Search Speed.

Supplementary Table 3

*Estimated correlations from the latent growth curve model of cognitive aging across 3 waves in the Lothian Birth Cohort 1921*

|                     | 1    | 2    | 3    | 4    | 5    | 6    | 7    | 8    | 9    | 10   | Mean | Variance |
|---------------------|------|------|------|------|------|------|------|------|------|------|------|----------|
| 1. Age-79 cognition | 1.00 |      |      |      |      |      |      |      |      |      | -.06 | .50      |
| 2. Age-83 cognition | .93  | 1.00 |      |      |      |      |      |      |      |      | -.13 | .55      |
| 3. Age-87 cognition | .78  | .95  | 1.00 |      |      |      |      |      |      |      | -.20 | .74      |
| 4. Model intercept  | 1.00 | .93  | .78  | 1.00 |      |      |      |      |      |      | -.06 | .50      |
| 5. Model slope      | -.07 | .30  | .57  | -.07 | 1.00 |      |      |      |      |      | -.02 | .01      |
| 6. Sex              | -.11 | -.16 | -.18 | -.11 | -.15 | 1.00 |      |      |      |      | .59  | .24      |
| 7. Social class     | -.40 | -.32 | -.23 | -.40 | .16  | .10  | 1.00 |      |      |      | .01  | 1.00     |
| 8. Education        | .49  | .43  | .35  | .49  | -.09 | -.12 | -.48 | 1.00 |      |      | .00  | 1.01     |
| 9. Age-11 IQ        | .67  | .63  | .54  | .67  | -.02 | .02  | -.42 | .46  | 1.00 |      | .03  | 1.03     |
| 10. Alcohol intake  | .10  | .05  | .00  | .10  | -.13 | -.25 | -.15 | .10  | .04  | 1.00 | -.01 | 1.03     |
| 11. Smoking status  | -.01 | -.02 | -.03 | -.01 | -.03 | -.12 | .04  | -.15 | -.04 | .16  | .00  | .99      |

*Note.* The model intercept and age-79 cognition factor were equivalent in the model. The model slope expressed the change per year. For sex, the reference category was male (the mean of .59 reflected the fact that 59% of the sample was female). Smoking status at age 79 was defined as never, ex or current; Education was the number of years in full-time formal education. All continuous variables were standardized prior to analysis.

Supplementary Table 4

*Estimated correlations from the latent growth curve model of cognitive aging across 2 waves in the MRC National Survey of Health and Development*

|                     | 1    | 2    | 3    | 4    | 5    | 6    | 7    | 8    | 9    | Mean | Variance |
|---------------------|------|------|------|------|------|------|------|------|------|------|----------|
| 1. Age-43 cognition | 1.00 |      |      |      |      |      |      |      |      | .08  | .07      |
| 2. Age-53 cognition | .93  | 1.00 |      |      |      |      |      |      |      | .07  | .08      |
| 3. Model intercept  | 1.00 | .93  | 1.00 |      |      |      |      |      |      | .08  | .07      |
| 4. Model slope      | -.13 | .26  | -.13 | 1.00 |      |      |      |      |      | .00  | .00      |
| 5. Sex              | .24  | .25  | .24  | .04  | 1.00 |      |      |      |      | .48  | .25      |
| 6. Education        | .70  | .69  | .70  | .03  | -.09 | 1.00 |      |      |      | .00  | 1.00     |
| 7. Social class     | -.49 | -.50 | -.49 | -.06 | .01  | -.47 | 1.00 |      |      | .04  | 1.01     |
| 8. Smoking status   | -.22 | -.23 | -.22 | -.05 | -.10 | -.23 | .18  | 1.00 |      | .03  | 1.00     |
| 9. Alcohol intake   | .07  | .05  | .07  | -.04 | -.33 | .14  | -.10 | .17  | 1.00 | -.02 | .82      |
| 10. Age-15 general  | .69  | .74  | .69  | .18  | -.01 | .53  | -.37 | -.14 | .11  | .01  | 1.00     |

ability

---

*Note.* The model intercept and age-43 cognition factor were equivalent in the model. The model slope expressed the change per year. For sex, the reference category was male (the mean of .48 reflected the fact that 48% of the sample was female). Smoking status at age 43 was defined as never, ex or current. All continuous variables were standardized prior to analysis.
